# Supplementary material for: Quantitative Analysis of Focused A-To-I RNA Editing Sites by Ultra-High-Throughput Sequencing in Psychiatric Disorders
Source: PLoS One. 2012 Aug 17;7(8):e43227. doi: 10.1371/journal.pone.0043227 (PMC3422315; doi:10.1371/journal.pone.0043227)
Supplement: Table S1 — Category I RNA editing sites with >1% A-to-I RNA editing in three sets of normal human samples. RNA editing frequency is presented as the percentage of the total population of transcripts. Three independent sets of normal human samples were used in this study. The first is the cortex and cerebellum pooled from 10 normal humans; the second comprises one subject (ID: S343) with 5 different brain regions sampled (Stanley Medical Research Institute; SMRI) and the third is of 5 normal humans (ID:228-451, 228-612, 228-695, 229116, 244-079) and two brain regions, anterior temporal cortex (ATC) and right frontal cortex (RFC, Brodmann areas 8&9) (Human Brain Collection Core). 11 new RNA editing sites are shown in red. The values of RNA editing frequency in the cerebellum, which were more than 1.5 fold different from the cortex, were highlighted. (XLSX) [file pone.0043227.s004.xlsx]

## Sheet: Sheet1
Table S1. Category I RNA editing sites with > 1% A-to-I RNA editing in three sets of normal human samples.
Gene Name	Site	Genomic position	Pooled brain samples		S343					228-451		228-612		228-695		229-116		244-079		Frequency (%) (Mean±SEM)	Reads (Mean±SEM)
			Cerebellum	Cortex	Premotor cortex	Motor cortex	Parietal cortex	Occipital cortex	Cerebellum	ATC	RFC	ATC	RFC	ATC	RFC	ATC	RFC	ATC	RFC
AZIN1	S/G	chr8:103910812	4.64	6.83	6.24	4.56893	5.63817	5.18253	2.35316	10.29	11.99	12.14	9.45	8.51	6	2.61	1.87	12.29	7.74	6.96±0.88	71,192±6,463
BLCAP	Y/C	chr20:35580986	29.62	23.88	40.99	29.8532	31.3894	31.3797	36.2556	44.23	44.37	26.53	35.97	44.85	42.05	40.49	39.92	44.54	39.88	36.84±1.76	13,040±2,405
BLCAP	Q/K	chr20:35580977	22.72	18.62	45.17	29.6763	30.7326	30.4015	35.571	44.74	44.07	24.68	39.17	48.5	46.04	40.72	40.76	47.83	43.3	37.22±2.43	13,040±2,406
BLCAP	K/R	chr20:35580947	9.86	9.65	14.74	10.8046	11.4471	11.1777	9.43917	17.28	16.49	9.86	13.45	15.57	14.79	12.6	12.49	16.68	13.94	12.96±0.68	13,040±2,407
CCNI	R/G	chr4:78198704	12.19	23.81	21.33	18.935	18.5092	16.4069	4.76907	14.56	17.36	28.33	23.03	24.95	20.69	15.54	15.5	30.9	28.67	19.73±1.71	92,647±6,897
CCNI	K/R	chr4:78196188	2.16	5.74	4.91	3.83702	3.99538	3.30878	0.809563	3.95	3.48	5.78	4.61	5.94	4.33	3.41	3.08	6.46	6.38	4.25±0.40	99,327±5,241
CRB2	T/A	chr9:125172441	2.07	2.94	5.3	2.88954	2.66955	2.70735	1.11504	2.11	1.75	2.47	3.47	2.29	3.26	1.71	2	2.87	3.17	2.63±0.24	36,336±3,848
CYFIP2	K/E	chr5:156669386	77.86	75.21	76.1023	79.8195	76.1391	77.0085	78.5534	18.8713	34.1381	73.4412	78.6271	76.4865	77.9009	66.1315	68.2919	72.7242	79.8184	69.83±4.38	72,192±4,190
CYFIP2	K/R	chr5:156669387	1.68	1.44	1.30593	1.37347	1.33746	1.25945	1.31675	0.456188	0.69422	1.32947	1.34372	1.4065	1.3517	0.989336	1.10804	1.28566	1.47473	1.24±0.08	72,192±4,191
FLNA	Q/R	chrX:153233144	30.91	28.64	26.37	10.9628	32.0767	16.1746	27.2639	6.03	16.68	12.6	20.48	12.67	18.29	7.93	12.15	17.68	23.21	18.83±2.09	59,725±4,313
FLNB	Q/R	chr3:58116841	17.73	3.59	2.48	2.93503	3.9675	4.0069	20.941	5.52	8.85	4.37	5.02	4.5	1.75	0.97	1.15	2.34	3.09	5.48±1.44	58,461±4,517
GABRA3	I/M	chrX:151108975	60.02	78.67	79.03	80.0313	79.5305	79.8898	57.2849	43.39	70.58	84.08	85.24	84.83	78.69	65.42	60.95	86.49	85.22	74.08±3.20	65,175±5,507
GLI1	R/G	chr12:56150891	35.82	67.69	59.5	64.5857	66.2338	60.9619	35.713	67.91	68.9	75.03	77.34	69.11	76.82	62.81	73.71	74.03	66.91	64.89±3.14	51,897±4,292
GRIA2	Q/Q	chr4:158477325	99.41	99.36	99.69	99.7544	99.8176	99.7168	99.7233	93.45	96.23	99.81	99.87	99.83	99.57	99.61	99.52	99.47	99.72	99.09±0.43	81,668±4,010
GRIA2	Q/R	chr4:158477329	22.52	22.05	18.13	20.0525	18.3688	18.4574	17.3613	10.05	13.18	20.83	21.79	19.92	19.16	11.84	12.12	18.07	19.15	17.83±0.98	81,668±4,011
GRIA2	R/G	chr4:158500744	62.24	65.28	61.92	64.3078	61.9826	58.1033	70.9897	15.65	19.83	71.72	72.8	77.57	67.53	45.98	39.06	70.34	76.21	58.91±4.75	24,308±2,737
GRIA3	R/G	chrX:122426643	90.79	95.05	95.81	96.7369	96.4767	95.5073	91.8378	51.01	75.96	96.94	97.68	97.3	94.44	94.58	94.02	95.05	97.81	91.59±3.00	35,143±1,593
GRIA4	R/G	chr11:105309904	2.02	2.34	2.92	3.35588	3.35092	2.60676	6.77161	3.66	0.08	4.55	4.89	4.84	4.78	3.72	3.59	4.08	4.56	3.65±0.38	13,651±2,085
GRIK1	Q/R	chr21:29875621	42.59	67.57	62.88	58.2933	57.1503	56.6226	38.6299	38.5	49.18	69.48	68.42	63.6	63.04	49.15	51.63	62.75	68.13	56.92±2.67	72,065±3,592
GRIK2	I/V	chr6:102444382	54.53	63.25	61.03	60.7721	59.8655	59.0188	54.0151	29.25	45.57	65.65	68	63.14	58.22	38.83	37.36	66.66	63.06	55.78±2.92	52,960±3,377
GRIK2	Y/C	chr6:102444395	86.98	86.78	87.57	88.8789	89.031	89.6392	88.8319	37.69	60.12	85	89.32	86.63	87.33	74.19	77.65	85.47	89.38	81.79±3.52	52,960±3,378
GRIK2	Q/R	chr6:102479281	77.28	77.34	80.73	76.6709	81.3699	81.6509	81.1008	42.52	55.02	82.78	83.79	84.34	81.09	79.54	80.75	82.08	85.42	77.26±2.89	42,994±3,236
5HT2C	A (I/V)	chrX:113988938	52.84	80.01	76.74	76.228	72.2502	72.1277	35.5946	30.06	71.92	79.17	79.04	79.9	76.95	58.17	55.67	80.45	79.15	68.02±4.11	63,901±4,434
5HT2C	B(I/M)	chrX:113988940	23.1	54.95	49.57	48.8078	46.7867	46.689	13.4068	4.46	51.88	49.32	52.67	52.25	52.56	27.09	27.6	54.46	54.71	41.78±4.15	63,901±4,435
5HT2C	E(N/D)	chrX:113988944	11.19	21.08	18.97	21.9447	20.4762	17.1041	2.88163	0.02	16.52	15.79	19.83	17.38	18.61	10.45	10.59	17.3	16.98	15.12±1.60	63,901±4,436
5HT2C	C(N/S)	chrX:113988945	37.14	55.29	55.04	54.7743	52.3469	50.459	16.1796	22.47	50.59	49.66	54.64	52.31	51.81	33.07	36.06	53.85	54.07	45.87±3.16	63,901±4,437
5HT2C	D(I/V)	chrX:113988950	53.32	63.37	61.64	65.2812	60.4868	61.5884	22.8408	48.66	61.11	55.91	58.62	57.99	64.9	47.79	49.76	59.49	62.74	56.21±2.63	63,901±4,437
IGFBP7	R/G	chr4:57671043	1.73	2.06	37.5	5.84795	12.4682	4.6875	28.2132	14.81	25	20	9.71	12.94	13.79	7.59	15.38	17.65	23.98	14.90±2.52	1,236±919
IGFBP7	K/R	chr4:57670991	61.08	51.79	47.06	40.8599	50.4876	47.474	62.4158	42.14	57.44	47	56.56	50.5	55.93	37.66	37.34	49.17	50.97	49.76±1.93	29,167±3,948
KCNA1	I/V	chr12:4892003	24.64	20.49	15.19	23.5541	15.8548	15.0125	14.6023	5.02	12.29	14.22	17.27	14.71	16.12	5.84	7.98	11.11	14.16	14.59±1.38	62,447±3,825
KCNMA1	S/G	chr10:79067304	13.17	25.81	21.76	22.0979	23.1101	23.9279	11.554	8.02	9.74	21.23	25.6	22.74	27.42	22.89	26.3	21.77	24.03	20.66±1.57	43,534±3,777
NCSTN	S/G	chr1:158586611	6.16	10.44	8.25	7.50175	8.8025	7.69882	4.79722	5.87	6.81	14.18	12.72	14.4	10.58	5.11	4.51	14.34	12.19	9.08±0.90	75,689±6,413
NEIL1	K/R	chr15:73433139	98.16	97.77	98.85	99.4474	99.6408	99.391	98.7343	95.81	100	99.4565	99.26	99.4	99.32	98.14	98.24	98.8	99.13	98.80±0.25	7,651±1,655
NEIL1	K/K	chr15:73433140	86.08	86.78	93.15	94.7452	95.0123	96.9082	84.7778	92.28	92.07	92.0767	92.85	93.51	95.18	93.86	92.73	89.73	94.36	92.12±0.88	7,651±1,656
TRO	S/G	chrX:54972292	4.68	14.28	11.01	11.8771	9.93641	9.60004	3.25156	4.41	4.24	11.56	14.71	11.43	13.15	7.16	7.8	10.46	12.79	9.55±0.95	52,312±7,660
TTLL3	K/R	chr3:9851560	2.72	4.49	4.64	3.5441	3.72666	3.89654	2.29129	2.92	2.51	5.53	4.35	3.93	3.45	5.72	8.64	3.76	4.74	4.17±0.39	54,057±4,098
