# Supplementary material for: Quantitative Analysis of Focused A-To-I RNA Editing Sites by Ultra-High-Throughput Sequencing in Psychiatric Disorders
Source: PLoS One. 2012 Aug 17;7(8):e43227. doi: 10.1371/journal.pone.0043227 (PMC3422315; doi:10.1371/journal.pone.0043227)
Supplement: Table S2 — Category II RNA editing sites with 0.08%–1% A-to-I RNA editing in three sets of normal human samples. RNA editing frequency is presented as the percentage of the total population of transcripts. Three independent sets of normal human samples were used in this study. The firstt is the cortex and cerebellum pooled from 10 normal humans; the second comprises one subject (ID: S343) with 5 different brain regions sampled (Stanley Medical Research Institute; SMRI) and the third is of 5 normal humans (ID:228-451, 228-612, 228-695, 229116, 244-079) and two brain regions, anterior temporal cortex (ATC) and right frontal cortex (RFC, Brodmann areas 8&9) (Human Brain Collection Core). The values of RNA eidting frequency above 0.08% were highlighted. (XLSX) [file pone.0043227.s005.xlsx]

## Sheet: Sheet1
Table S2. Category II RNA editing sites with 0.08%- 1% A-to-I RNA editing in three sets of normal human samples.
Gene Name	Site	Genomic position	Pooled brain samples		S343					228-451		228-612		228-695		229-116		244-079		Frequency (%) (Mean±SEM)	Reads (Mean±SEM)
			Cerebellum	Cortex	Premotor cortex	Motor cortex	Parietal cortex	Occipital cortex	Cerebellum	ATC	RFC	ATC	RFC	ATC	RFC	ATC	RFC	ATC	RFC
AEBP1	E/G	chr7:44120144	0.14	0.12	0.52	0.0415642	0.0527029	0.0390686	0.0336022	0.5	0.53	0.055325	0.5	0.46	0.4	0.47	0.54	0.47	0.47	0.31±0.06	27,406±3,376
KCNQ5	Q/R	chr6:73899915	0.07	0.06	0.18	0.0274822	0.0250683	0.0411123	0.0229984	0.13	0.11	0.0395814	0.11	0.16	0.16	0.12	0.11	0.18	0.16	0.10±0.01	68,963±4,411
KIF1A	E/G	chr2:241349449	0.12	0.13	0.48	0.0276961	0.0214316	0.0301561	0.0257009	0.22	0.33	0.0320026	0.28	0.44	0.37	0.25	0.27	0.49	0.4	0.23±0.04	50,229±3,503
PTPRN2	E/G	chr7:157026230	0.07	0.06	0.1	0.0685687	0.0608924	0.075924	0.0372745	0.1	0.09	0.0561543	0.09	0.09	0.09	0.12	0.11	0.13	0.11	0.09±0.01	54,050±4,739
