# Supplementary material for: Quantitative Analysis of Focused A-To-I RNA Editing Sites by Ultra-High-Throughput Sequencing in Psychiatric Disorders
Source: PLoS One. 2012 Aug 17;7(8):e43227. doi: 10.1371/journal.pone.0043227 (PMC3422315; doi:10.1371/journal.pone.0043227)
Supplement: Table S8 — Distribution of the frequency (%) of 24 isoforms of 5HT2C receptors produced by RNA editing in normal and psychiatric disorder patients. 5-HT2C receptor isoform frequency is presented as mean, expressed as a percentage of the total population of transcripts, ± SEM. The data were analyzed t-test with Benjamini–Hochberg correction for multiple comparisons using a P value of 0.05 as criterion of statistical significance. (XLSX) [file pone.0043227.s011.xlsx]

## Sheet: Sheet1
Table S8. Distribution of the frequency (%) of 24 isoforms of 5HT2C receptors produced by RNA editing in normal and psychiatric disorder patients.
Isoform	Control (n=15)	MDD (n=15)	MDD-suicide (n=15)	SCZ (n=15)	SCZ-suicide (n=12)
IDI	1.11±0.29	0.77±0.13	0.81±0.08	0.76±0.13	0.83±0.15
IDV	0.44±0.07	0.23±0.04	0.37±0.06	0.34±0.07	0.39±0.07
IGI	0.63±0.08	0.47±0.08	0.70±0.15	0.71±0.13	0.55±0.08
IGV	0.41±0.10	0.31±0.07	0.45±0.18	0.32±0.07	0.28±0.05
INI	9.69±1.24	9.07±1.33	8.25±1.02	11.54±1.60	9.67±1.72
INV	4.18±0.47	4.54±1.05	3.05±0.31	4.06±0.44	3.85±0.49
ISI	3.28±0.31	6.58±3.37	2.98±0.23	3.80±0.44	3.08±0.44
ISV	3.29±0.32	2.20±0.24	2.30±0.21	3.56±0.55	2.41±0.34
MDI	0.02±0.01	0.01±0.01	0.02±0.01	0.02±0.01	0.03±0.01
MDV	0.08±0.04	0.04±0.01	0.03±0.01	0.06±0.02	0.05±0.02
MGI	0.02±0.01	0.00±0.00	0.01±0.00	0.00±0.00	0.01±0.01
MGV	0.01±0.00	0.00±0.00	0.01±0.00	0.01±0.00	0.01±0.00
MNI	1.16±0.16	1.02±0.15	1.33±0.13	1.34±0.16	1.06±0.13
MNV	1.50±0.14	1.35±0.19	1.38±0.17	1.92±0.26	1.49±0.16
MSI	0.23±0.04	0.58±0.32	0.24±0.05	0.20±0.05	0.24±0.05
MSV	0.52±0.19	0.32±0.06	0.31±0.04	0.37±0.06	0.27±0.04
VDI	1.57±0.16	1.26±0.16	1.53±0.10	1.38±0.19	1.27±0.19
VDV	2.97±0.31	2.87±0.41	3.38±0.16	2.78±0.43	2.69±0.34
VGI	4.66±0.40	4.15±0.48	4.97±0.23	4.28±0.43	4.81±0.46
VGV	6.51±0.45	5.34±0.58	7.03±0.45	5.02±0.46	6.73±0.53
VNI	7.72±0.47	9.20±0.94	8.52±0.61	10.01±1.07	7.93±0.35
VNV	16.84±0.68	20.05±1.93	16.97±1.25	17.09±0.77	19.01±0.46
VSI	6.86±0.37	7.48±0.65	8.07±0.87	6.78±0.70	8.21±0.58
VSV	26.32±1.12	22.14±1.96	27.29±0.80	23.65±1.41	25.14±1.32
